# Supplementary material for: Iron vs. cobalt clathrochelate electrocatalysts of HER: the first example on a cage iron complex
Source: Royal Society of Chemistry journal article supplement (doi:10.1039/c3dt33073g), 2013-01-01
Supplement: c3dt33073g.pdf [file c3dt33073g.pdf]

## Supplementary Information

The reagents used,  $\text{FeCl}_2 \cdot 4\text{H}_2\text{O}$ ,  $\text{CoCl}_2 \cdot 6\text{H}_2\text{O}$ , 2-thiopheneboronic acid, cyclohexanedion-1,2-dioxime (nioxime,  $\text{H}_2\text{Nx}$ ), triethylamine, sorbents and solvents were obtained commercially (Acros).

Analytical data (C, H, N content) were obtained with a Carlo Erba model 1106 microanalyzer.

The MALDI-TOF mass spectra were recorded in both the positive and negative spectral regions using a MALDI-TOF-MS Bruker Autoflex mass spectrometer in reflecto-mol mode. The ionization was induced by UV-laser with wavelength 336 nm. The sample was applied to a nickel plate, 2,5-dihydroxybenzoic acid was used as a matrix. The accuracy of measurements was 0.1%.

The IR spectra of the solid samples (KBr tablets) in the range 400 – 4000  $\text{cm}^{-1}$  were recorded with a IR200 Thermo Nicolet FT-spectrophotometer.

The UV-vis spectra of the solutions in dichloromethane were recorded in the range 230 – 800 nm with a Lambda 9 Perkin Elmer spectrophotometer. The individual Gaussian components of these spectra were calculated using the SPECTRA program.

The  $^1\text{H}$  and  $^{13}\text{C}\{^1\text{H}\}$  NMR spectra of the complexes obtained were recorded from their  $\text{CD}_2\text{Cl}_2$  solutions using a Bruker Avance 400 FT-spectrometer.

X-band EPR spectra were acquired on a Bruker Eleksys E580 X/Q-band EPR spectrometer equipped with ER 4118X-MD5W resonator and Oxford Instruments cryogenic system. The glassy samples for the EPR experiments were obtained from 1 mM solutions of the clathrochelate complexes in the toluene:dichloromethane (1:1, v/v) mixture. The EPR spectra were registered using the following parameters: microwave frequency 9.4 GHz, microwave power in the range 0.2 – 0.002 mW, sweep width 1800 G, modulation frequency 100 kHz, modulation amplitude 1 G, conversion time and time constant in the range 20.48 – 81.92 ms, resolution 2048 points.

$CoNx_3(BThioph)_2$ . Anal. calc. for  $C_{26}H_{30}B_2CoN_6O_6S_2$  (%): C, 46.78; H, 4.50; N, 12.59. Found (%): C, 46.57; H, 4.39; N, 12.43.  $^1H$  NMR ( $CD_2Cl_2$ ):  $\delta$  (ppm) – 33.7 (br s, 12H,  $\alpha$ -CH<sub>2</sub>), 5.16 (s, 12H,  $\beta$ -CH<sub>2</sub>), 6.20 (br s, 2H, thiophene-3H), 6.57 (s, 2H, thiophene-4H), 6.93 (s, 2H, thiophene-5H).  $^{13}C\{^1H\}$  NMR ( $CD_2Cl_2$ ):  $\delta$  (ppm) 22.4 (s,  $\beta$ -CH<sub>2</sub>), 129.0, 129.9, 132.0 (all s, thiophene). MS (MALDI-TOF):  $m/z$  (positive range) 667 [ $M$ ]<sup>+</sup>; (negative range) – 667 [ $M$ ]<sup>–</sup>. IR (cm<sup>–1</sup>, KBr): 930, 1035, 1061, 1164  $\nu$ (N – O), 1225m  $\nu$ (B – O), 1579  $\nu$ (C=N). UV-Vis ( $CH_2Cl_2$ ):  $\lambda_{max}$  ( $\epsilon \times 10^{-3}$ , mol<sup>–1</sup> L cm<sup>–1</sup>): 238 (19), 265 (11), 292 (6.4), 360 (4.9), 460 (2.0), 480 (3.1).

$FeNx_3(BThioph)_2$ . Anal. calc. for  $C_{26}H_{30}B_2FeN_6O_6S_2$  (%): C, 46.78; H, 4.50; N, 12.59. Found (%): C, 46.66; H, 4.36; N, 12.39. MS (MALDI-TOF):  $m/z$  (positive range) 664 [ $M$ ]<sup>+</sup>; (negative range) – 664 [ $M$ ]<sup>–</sup>.  $^1H$  NMR ( $CD_2Cl_2$ ):  $\delta$  (ppm) 1.68 (s, 12H,  $\beta$ -CH<sub>2</sub>), 2.79 (s, 12H,  $\alpha$ -CH<sub>2</sub>), 7.00 (m, 2H, thiophene-3H), 7.18 (m, 2H, thiophene-4H), 7.30 (m, 2H, thiophene-5H).  $^{13}C\{^1H\}$  NMR ( $CD_2Cl_2$ ):  $\delta$  (ppm) 23.5 (s,  $\beta$ -CH<sub>2</sub>), 28.2 (s,  $\alpha$ -CH<sub>2</sub>), 128.8, 129.2, 131.9 (all s, thiophene), 154.2 (s, C=N). IR (cm<sup>–1</sup>, KBr): 932, 1033, 1058, 1163  $\nu$ (N – O), 1224m  $\nu$ (B – O), 1582  $\nu$ (C=N). UV-Vis ( $CH_2Cl_2$ ):  $\lambda_{max}$  ( $\epsilon \times 10^{-3}$ , mol<sup>–1</sup> L cm<sup>–1</sup>): 233 (23), 252 (11), 283 (5.7), 297 (4.4), 348 (1.9), 441 (6.5), 452 (11).

Cyclic voltammetry (CV) experiments were carried out in acetonitrile solutions with 0.1M ((*n*-C<sub>4</sub>H<sub>9</sub>)<sub>4</sub>N)BF<sub>4</sub> as a supporting electrolyte using a model Parstat 2273 (Princeton Applied Research, USA) potentiostat with a conventional one-compartment three-electrode cell (10 ml of solution). Glass carbon (GC) electrode with an active surface area of 0.125 cm<sup>2</sup> was used as a working electrode. The electrode was thoroughly polished and rinsed before measurements. A platinum counter electrode and a standard Ag/AgCl/KCl<sub>aq</sub> reference electrode were applied. The measurements were performed at scan rates from 50 to 2000 mV s<sup>–1</sup>. All the solutions were thoroughly deaerated by passing argon through them before the CV experiments and above them during the measurements.

**Controlled-potential electrolysis.** 25 mM HClO<sub>4</sub> acetonitrile solution with 0.1 M ((*n*-C<sub>4</sub>H<sub>9</sub>)<sub>4</sub>N)BF<sub>4</sub> as a supporting electrolyte was electrolyzed for 60 min in the presence of the complexes CoNx<sub>3</sub>(BThioph)<sub>2</sub> and FeNx<sub>3</sub>(BThioph)<sub>2</sub> (*c* = 1 mM) at –700 and –1350 mV, respectively. 50 mM ((C<sub>2</sub>H<sub>5</sub>)<sub>3</sub>N)Cl acetonitrile solution with 0.1 M ((*n*-C<sub>4</sub>H<sub>9</sub>)<sub>4</sub>N)BF<sub>4</sub> as a supporting electrolyte was electrolyzed for 60 min in the presence of the complexes CoNx<sub>3</sub>(BThioph)<sub>2</sub> and FeNx<sub>3</sub>(BThioph)<sub>2</sub> (*c* = 1 mM) at –700 and –1350 mV, respectively. The production of the molecular hydrogen was confirmed by gas chromatography analysis.

**Hydrogen Detection.** Gas chromatography analysis of gases evolved during the electrolysis was performed with a Varian 450 GC equipped with a pulsed discharge helium ionization detector D-4-I-VA38-R. Hydrogen production was quantitatively detected using a 30 m-in-length stainless steel column with inside diameter 250 μm at 120°C for the detector and at 80°C for the oven. The carrier gas was helium flowing at a rate of 40 ml min<sup>–1</sup>. The injections (250 μL) were performed *via* a sampling loop. The retention time of gaseous H<sub>2</sub> was 2.48 min.

**Kinetic studies.** To estimate the *k*<sub>obs</sub> values for the electrocatalytic process 2H<sup>+</sup>/H<sub>2</sub>, we used an eq. 1 for the pseudo first-order reaction [S1 – S4]:

$$\frac{i_c}{i_p} = \frac{n}{0.4463} \sqrt{\frac{RTk_{obs}}{Fv}} \quad (1),$$

where *i*<sub>c</sub> is the catalytic plateau current, *i*<sub>p</sub> is the noncatalytic peak current (here taken from the reversible reduction peak assigned to the Co<sup>2+/+</sup> or Fe<sup>2+/+</sup> redox couple in acetonitrile), *T* = 298.15 K, *F* is Faraday constant, and *v* is a scan rate.

To obtain the values of *k*<sub>obs</sub>, we used the method developed in [S5]. A detailed study of a dependence of the catalytic current for the acetonitrile solutions of the complexes CoNx<sub>3</sub>(BThioph)<sub>2</sub> and FeNx<sub>3</sub>(BThioph)<sub>2</sub> vs scan rate was performed. A catalytic current is independent on scan rates exceed 1000 mV s<sup>–1</sup> (Figs. SI3 – SI6). If we assume that two electrons are passed for each H<sub>2</sub> molecule produced (*n* = 2), and an acid concentration does not change significantly in the course of an

experiment, the eq. 2 can be transformed into the eq. 3 allowing to calculate the catalytic turnover frequency  $k_{\text{obs}}$ .

$$\frac{i_{\text{cat}}}{i_p} = \frac{n}{0.4463} \sqrt{\frac{RT(k[H^+])}{Fv}} \quad (2)$$

$$k_{\text{obs}} = v \cdot \left( \frac{i_{\text{cat}}/i_p}{0.72} \right)^2 \quad (3)$$

**X-ray crystallography.** The details of crystal data collection and refinement for the complexes  $\text{CoNx}_3(\text{BThioph})_2 \cdot \text{CHCl}_3$  and  $\text{FeNx}_3(\text{BThioph})_2 \cdot \text{CH}_2\text{Cl}_2$  complexes are listed in Table S1. Single-crystal X-ray diffraction experiments were carried out at 100(2) K with a Bruker Apex II CCD area detector (graphite monochromated Mo-K $\alpha$  radiation for the cobalt clathrochelate and Cu-K $\alpha$  radiation with microfocus tube with multilayer optics for the iron macrobicycle). Reflections intensities were corrected by a semi-empirical method using SADABS program [S6]. The structures were solved by the direct method and refined by full-matrix least squares against  $F^2$  on all data using SHELXTL software [S7]. Nonhydrogen atoms were refined in anisotropic approximation except the disordered ones in the clathrochelate molecules of 2-thiopheneboron-capped macrobicycle, one of the two apical substituents is disordered (with the site occupancies equal to 0.7 : 0.3 and 0.8 : 0.2, respectively); both of these disordered 2-thiophene substituents are situated in the same plane. Positions of the hydrogen atoms were calculated and refined using the riding model with isotropic temperature factors  $U_{\text{iso}} = 1.2U_{\text{eq}}(\text{C})$ , where  $U_{\text{eq}}$  values are the equivalent isotropic parameters of parent atoms.

## Supporting Information References

- [S1] C.P. Andrieux, J.M. Dumas-Bouchiat, J.M. Saveant, *J. Electroanal. Chem.* 1980, 113, 1–18.
- [S2] J.M. Saveant, E. Vianello, *Electrochim. Acta* 1965, 10, 905–920.
- [S3] J.M. Saveant, E. Vianello, *Electrochim. Acta* 1967, 12, 629– 646.
- [S4] J.M. Saveant, *Chem. Rev.* 2008, 108, 2348–2378.
- [S5] M.L. Helm, M.P. Stewart, R.M. Bullock, M.R. DuBois, D.L. DuBois, *Science* 2011, 333, 863–866.
- [S6] G.M. Sheldrick (1998). SADABS v.2.01, Bruker/Siemens Area Detector Absorption Correction Program, Bruker AXS, Madison, Wisconsin, USA.
- [S7] G.M. Sheldrick, *Acta Cryst. A* 64 (2008) 112.
- [S8] Y.Z. Voloshin, A.Y. Lebedev, V.V. Novikov, A.V. Dolganov, A.V. Vologzhanina, E.G. Lebed, A.A. Pavlov, Z.A. Starikova, M.I. Buzin, Y.N. Bubnov, *Inorg. Chim. Acta*, 2012, submitted, ICA-D-12-00696.

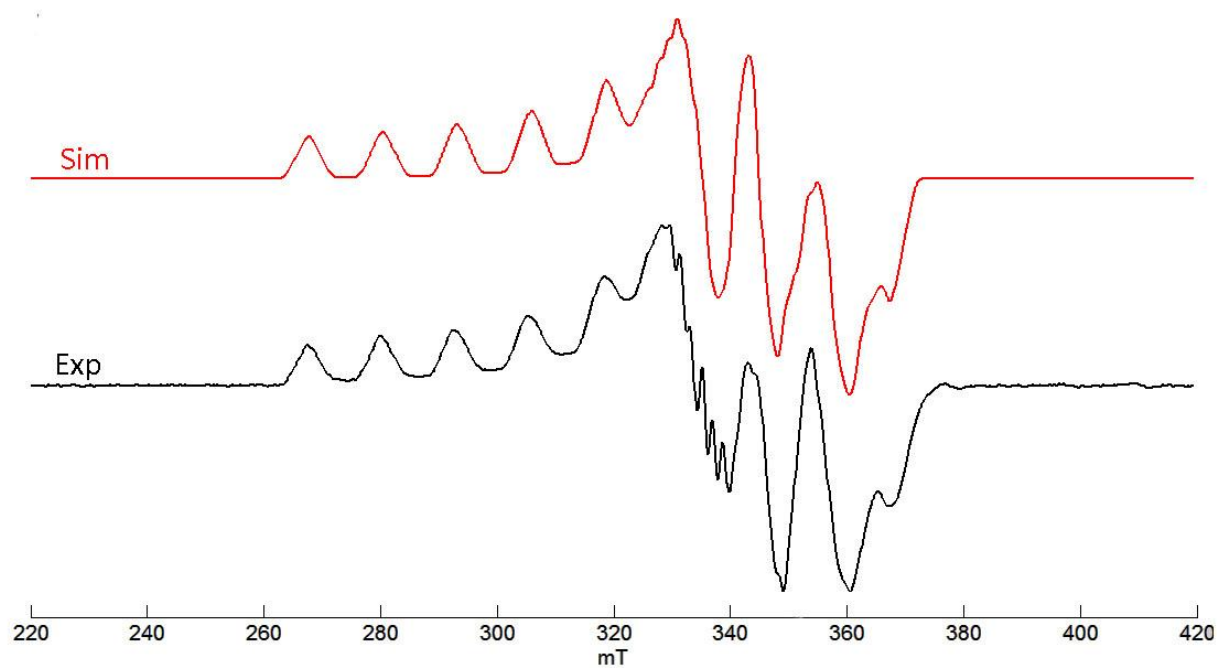

**Fig. S1.** The experimental and simulated EPR spectra of the clathrochelate  $\text{CoNx}_3(\text{BThioph})_2$  at 30K. The simulation parameters are as follows:  $g_{xx} = 1.950$ ,  $g_{yy} = 2.090$ ,  $g_{zz} = 2.215$ ,  $A_{xx} = 50$ ,  $A_{yy} = 23$ ,  $A_{zz} = 395$  MHz.

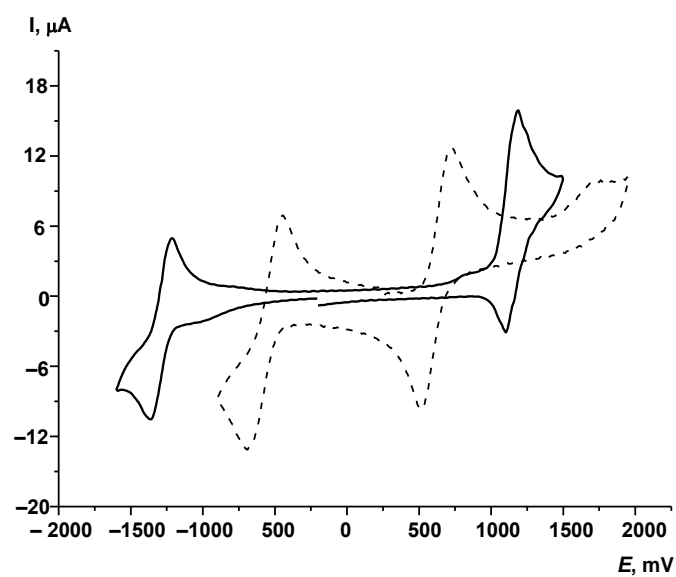

**Fig. S2.** CV for 3 mM acetonitrile solution of the clathrochelates FeNx<sub>3</sub>(BTioph)<sub>2</sub> (solid line) and CoNx<sub>3</sub>(BTioph)<sub>2</sub> (dashed line) at scan rate 200 mV s<sup>-1</sup> on GC electrode.

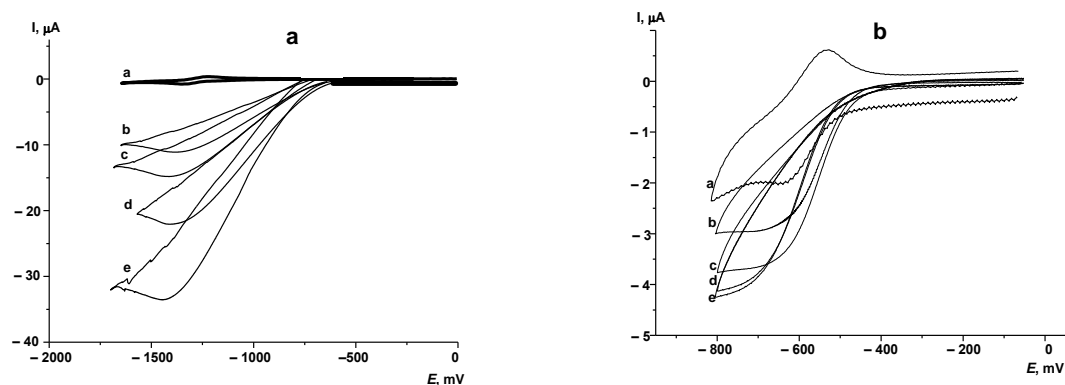

**Fig. S3.** CVs of the clathrochelates  $\text{FeN}_x\text{}_3(\text{BTioph})_2$  (a) and  $\text{CoN}_x\text{}_3(\text{BTioph})_2$  (b) ( $c = 1 \text{ mM}$ ) on GC electrode in  $0.1 \text{ M } ((n\text{-C}_4\text{H}_9)_4\text{N})\text{BF}_4$  acetonitrile solution in the absence (a) and in the presence of  $((\text{C}_2\text{H}_5)_3\text{NH})\text{Cl}$ : 5 (b), 10 (c), 15 (d), and 25 mM (e) at scan rate  $100 \text{ mV s}^{-1}$ .



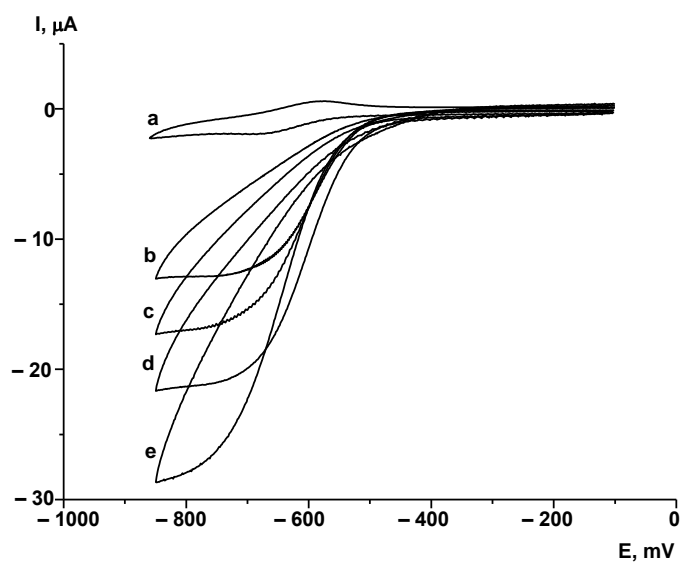

**Fig. S4.** CVs of 1 mM clathrochelate  $\text{CoN}_x\text{}_3(\text{BTioph})_2$  on GC electrode in 0.1M  $((n\text{-C}_4\text{H}_9)_4\text{N})\text{BF}_4$  acetonitrile solution in the absence (**a**) and in the presence of  $\text{HClO}_4$ : 5 (**b**), 10 (**c**), 15 (**d**), and 25 mM (**e**) at scan rate  $100 \text{ mV s}^{-1}$ .

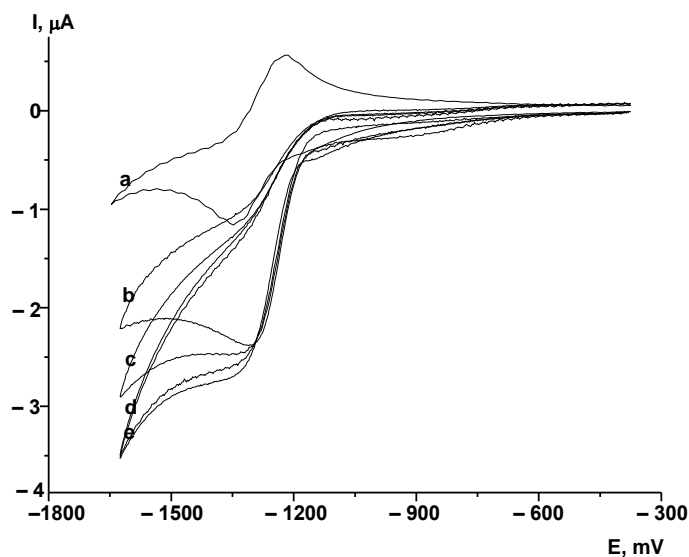

**Fig. S5.** CVs of 1 mM clathrochelate  $\text{FeN}_x\text{}_3(\text{BTioph})_2$  on GC electrode in 0.1 M  $((n\text{-C}_4\text{H}_9)_4\text{N})\text{BF}_4$  acetonitrile solution in the absence (**a**) and in the presence of  $\text{HClO}_4$ : 5 (**b**), 10 (**c**), 15 (**d**), and 25 mM (**e**) at scan rate  $100 \text{ mV s}^{-1}$ .

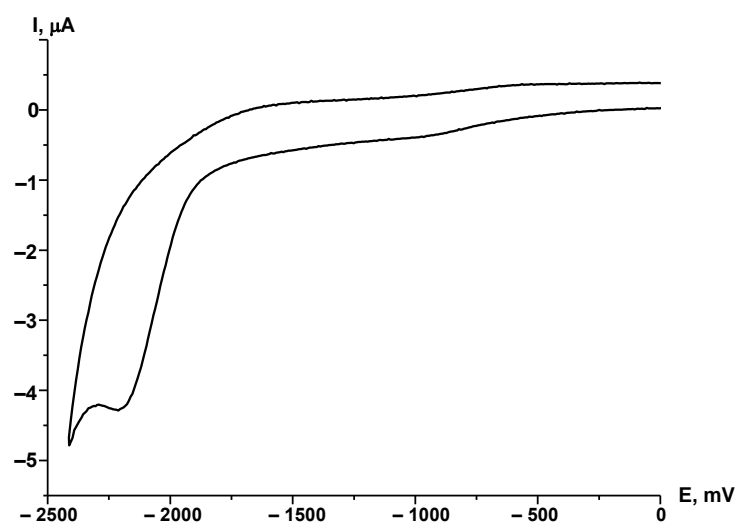

**Fig. S6** CV for 1 mM acetonitrile solution of the  $(\text{Et}_3\text{NH})\text{Cl}$  at scan rate  $200 \text{ mV s}^{-1}$  on GC.

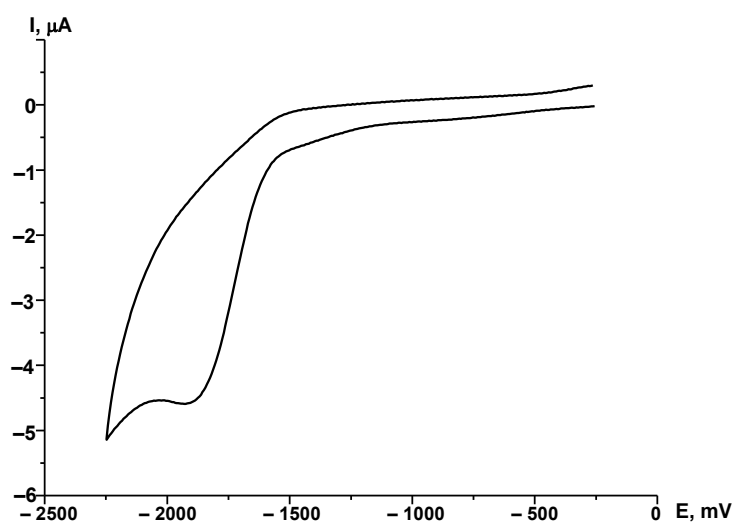

**Fig. S7.** CV for 1 mM acetonitrile solution of the  $\text{HClO}_4$  at scan rate  $200 \text{ mV s}^{-1}$  on GC.

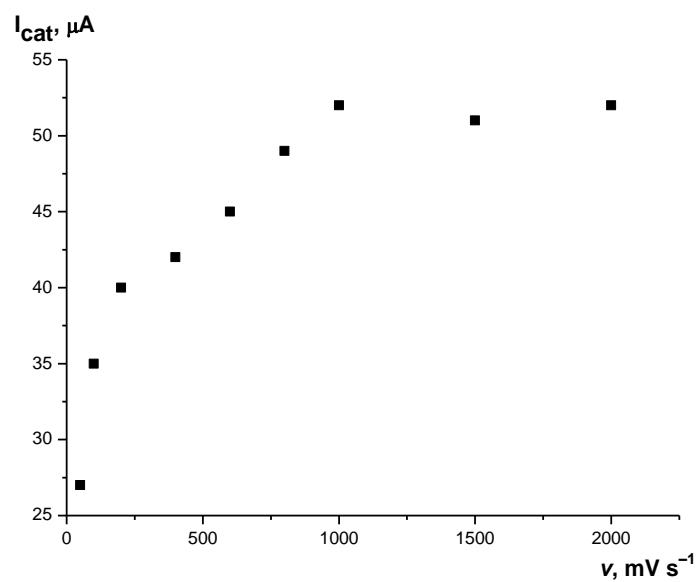

**Fig. S8.** Plot of  $I_{cat}$  vs scan rate for 1 mM acetonitrile solution of the complex  $FeN_x_3(BTioph)_2$  in the presence of 25 mM  $((C_2H_5)_3NH)Cl$ .

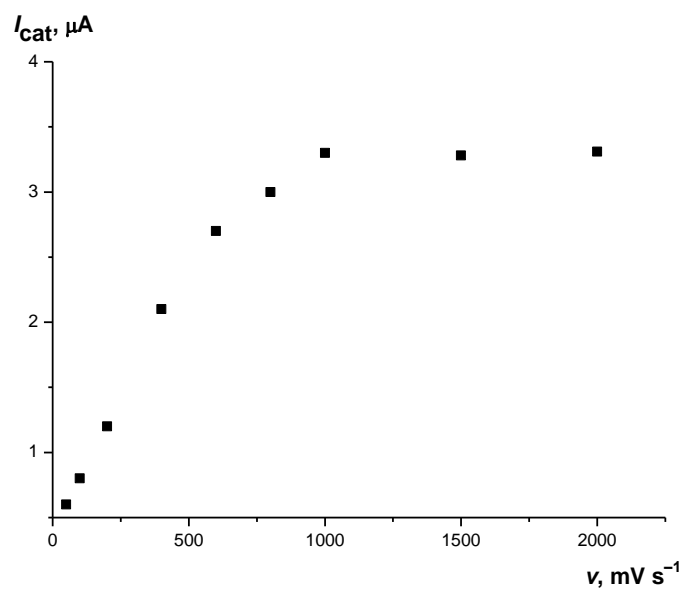

**Fig. S9.** Plot of  $I_{\text{cat}}$  vs scan rate for 1 mM acetonitrile solution of the complex  $\text{FeNx}_3(\text{BTioph})_2$  in the presence of 25 mM  $((\text{C}_2\text{H}_5)_3\text{NH})\text{Cl}$ .

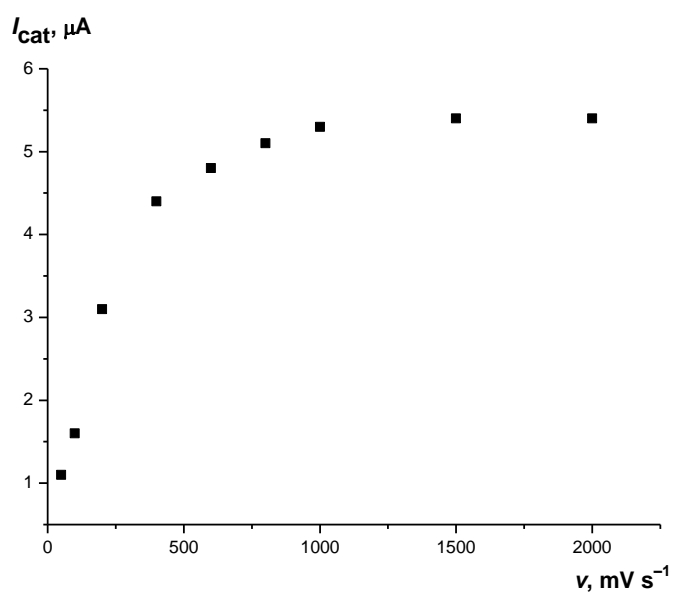

**Fig. S10.** Plot of  $I_{cat}$  vs scan rate for 1 mM acetonitrile solution of the complex  $FeNx_3(BTioph)_2$  in the presence of 25 mM  $HClO_4$ .

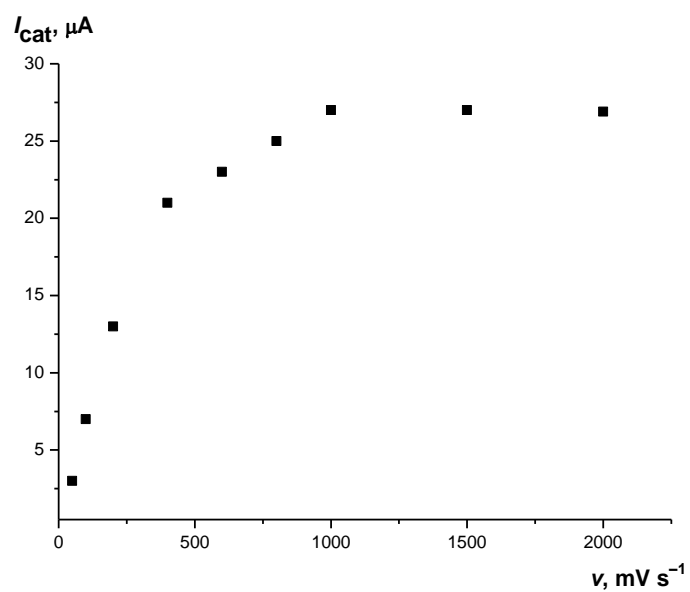

**Fig. S11.** Plot of  $I_{cat}$  vs scan rate for the 1 mM acetonitrile solution of the complex  $CoNx_3(BTioph)_2$  in the presence of 25 mM  $HClO_4$ .



**Table S1.** Crystallographic data and refinement parameters for the 2-thiopheneboron-capped cobalt and iron(II) tris-nioximates

|                                                                                  | CoN <sub>x</sub> 3(BThioph) <sub>2</sub> · CHCl <sub>3</sub>                                                      | FeN <sub>x</sub> 3(BThioph) <sub>2</sub> · CH <sub>2</sub> Cl <sub>2</sub>                                                      |
|----------------------------------------------------------------------------------|-------------------------------------------------------------------------------------------------------------------|---------------------------------------------------------------------------------------------------------------------------------|
| Empirical formula                                                                | C <sub>26</sub> H <sub>30</sub> B <sub>2</sub> FeN <sub>6</sub> O <sub>6</sub> S <sub>2</sub> · CHCl <sub>3</sub> | C <sub>26</sub> H <sub>30</sub> B <sub>2</sub> FeN <sub>6</sub> O <sub>6</sub> S <sub>2</sub> · CH <sub>2</sub> Cl <sub>2</sub> |
| Fw                                                                               | 786.60                                                                                                            | 749.08                                                                                                                          |
| Color, habit                                                                     | dark-brown, plate                                                                                                 | dark-orange, prism                                                                                                              |
| Crystal size (mm <sup>3</sup> )                                                  | 0.43 × 0.26 × 0.07                                                                                                | 0.16 × 0.15 × 0.09                                                                                                              |
| <i>a</i> (Å)                                                                     | 11.1528 (8)                                                                                                       | 11.6442 (2)                                                                                                                     |
| <i>b</i> (Å)                                                                     | 18.4231 (14)                                                                                                      | 11.9248 (2)                                                                                                                     |
| <i>c</i> (Å)                                                                     | 15.9011 (13)                                                                                                      | 13.3359 (2)                                                                                                                     |
| $\alpha$ (°)                                                                     | 90                                                                                                                | 92.188 (1)                                                                                                                      |
| $\beta$ (°)                                                                      | 91.971 (2)                                                                                                        | 104.060 (1)                                                                                                                     |
| $\gamma$ (°)                                                                     | 90                                                                                                                | 115.847 (1)                                                                                                                     |
| <i>V</i> (Å <sup>3</sup> )                                                       | 3265.3 (4)                                                                                                        | 1594.41 (5)                                                                                                                     |
| <i>Z</i>                                                                         | 4                                                                                                                 | 2                                                                                                                               |
| Crystal system                                                                   | monoclinic                                                                                                        | triclinic                                                                                                                       |
| Space group                                                                      | <i>P</i> 2 <sub>1</sub> / <i>c</i>                                                                                | $\overline{P}1$                                                                                                                 |
| <i>d</i> <sub>calc</sub> (g · cm <sup>-3</sup> )                                 | 1.600                                                                                                             | 1.560                                                                                                                           |
| $\mu$ (mm <sup>-1</sup> )                                                        | 0.951                                                                                                             | 7.001                                                                                                                           |
| Min. / max. transmission coeff.                                                  | 0.745, 0.936                                                                                                      | 0.376, 0.530                                                                                                                    |
| 2 $\theta$ max (°)                                                               | 56                                                                                                                | 128                                                                                                                             |
| Independent reflections ( <i>R</i> <sub>int</sub> )                              | 7887 (0.066)                                                                                                      | 5148 (0.033)                                                                                                                    |
| Obs.refl./restraints/ parameters                                                 | 5580 / 6 / 416                                                                                                    | 4886 / 20 / 427                                                                                                                 |
| <i>R</i> , <sup>a</sup> % [ <i>F</i> <sup>2</sup> > 2σ( <i>F</i> <sup>2</sup> )] | 0.044                                                                                                             | 0.029                                                                                                                           |
| <i>R</i> <sub>w</sub> , <sup>b</sup> % ( <i>F</i> <sup>2</sup> )                 | 0.093                                                                                                             | 0.086                                                                                                                           |
| GOF <sup>c</sup>                                                                 | 1.01                                                                                                              | 1.00                                                                                                                            |
| Largest diff. peak and hole (e Å <sup>-3</sup> )                                 | 1.57 and – 0.86                                                                                                   | 0.41 and – 0.57                                                                                                                 |
| F(000)                                                                           | 1612                                                                                                              | 772                                                                                                                             |

Supporting Information\_Thiophene\_2-1

**Table S2.** The main geometrical parameters of the macrobicyclic cobalt and iron(II) tris-nioximates

| Parameter               | CoNx <sub>3</sub> (BThioph) <sub>2</sub> | CoNx <sub>3</sub> (B <i>n</i> -C <sub>4</sub> H <sub>9</sub> ) <sub>2</sub> [S8] | FeNx <sub>3</sub> (BThioph) <sub>2</sub> | FeNx <sub>3</sub> (B <i>n</i> -C <sub>4</sub> H <sub>9</sub> ) <sub>2</sub> [S8] |
|-------------------------|------------------------------------------|----------------------------------------------------------------------------------|------------------------------------------|----------------------------------------------------------------------------------|
| Co – N ( Å )            | 1.885(2) – 2.115 (2)                     | 1.876(4) – 2.063(4)                                                              | 1.904(2) – 1.920(2)                      | 1.898 – 1.913                                                                    |
| <i>av.</i> Co – N ( Å ) | 1.970                                    | 1.943                                                                            | 1.912                                    | 1.906                                                                            |
| Δ ( Å )                 | 0.23                                     | 0.19                                                                             | 0.02                                     | 0.02                                                                             |
| B – O ( Å )             | 1.492(3) – 1.507(3)                      | 1.502                                                                            | 1.484(3) – 1.503(3)                      | 1.499                                                                            |
|                         | <i>av.</i> 1.498                         |                                                                                  | <i>av.</i> 1.493                         |                                                                                  |
| N – O ( Å )             | 1.367(2) – 1.382(2)                      | 1.330                                                                            | 1.371(2) – 1.380(2)                      | 1.371                                                                            |
|                         | <i>av.</i> 1.375                         |                                                                                  | <i>av.</i> 1.378                         |                                                                                  |
| C=N ( Å )               | 1.283(3) – 1.303(3)                      | 1.295                                                                            | 1.301(3) – 1.309(3)                      | 1.302                                                                            |
|                         | <i>av.</i> 1.297                         |                                                                                  | <i>av.</i> 1.305                         |                                                                                  |
| C – C ( Å )             | 1.444(3) – 1.479(3)                      | 1.412                                                                            | 1.434(3) – 1.443(3)                      | 1.434                                                                            |
|                         | <i>av.</i> 1.458                         |                                                                                  | <i>av.</i> 1.439                         |                                                                                  |
| B – C ( Å )             | 1.581(4) – 1.585(4)                      | 1.545                                                                            | 1.582(3) – 1.588(3)                      | 1.587                                                                            |
|                         | <i>av.</i> 1.583                         |                                                                                  | <i>av.</i> 1.586                         |                                                                                  |
| $\varphi$ ( ° )         | 4.3                                      | 7.0                                                                              | 18.6                                     | 20.3                                                                             |
| $\alpha$ ( ° )          | 38.5                                     | 37.5                                                                             | 39.1                                     | 39.1                                                                             |
| <i>h</i> ( Å )          | 2.45                                     | 2.36                                                                             | 2.36                                     | 2.36                                                                             |
